# Supplementary material for: Evaluation of coral reef carbonate production models at a global scale
Source: Copernicus journal article supplement (doi:10.5194/bg-12-1339-2015), 2015-03-04
Supplement: Supplementary file 1 [file bg-12-1339-2015-supplement-cover-letter.pdf › bg-12-1339-2015-supplement-cover-letter.pdf]

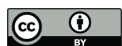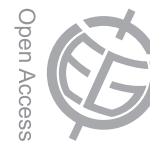

## *Supplement of*

# **Evaluation of coral reef carbonate production models at a global scale**

**N. S. Jones et al.**

*Correspondence to:* E. J. Hendy (e.hendy@bristol.ac.uk)

- bg-12-1339-2015-supplement-cover-letter.pdf
- Jones\_ReefCarbModels\_SuppMaterial150226.xlsx
- \_\_MACOSX
  - .\_Jones\_ReefCarbModels\_SuppMaterial150122.xlsx
