# Supplementary material for: Evaluation of coral reef carbonate production models at a global scale
Source: Copernicus journal article supplement (doi:10.5194/bg-12-1339-2015), 2015-03-04
Supplement: Supplementary file 1 [file Jones_ReefCarbModels_SuppMaterial150226.xlsx]

## Sheet: Core data
	Supplement Below are coral core data collected from the literature for the purpose of model evaluation. The reef names and IDs appear as they were reported. Values that were not reported and could not be derived from the published information are marked with '—'. Values of coral calcification (Gcoral) are the mean values reported or mean values calculated from individual core values; standard dev…
	Source	Region	Reef (full name)	Reef ID	Genus	Gcoral g cm-2 yr-1	±SD	No. cores	Lat °N	Lon °E
	Heiss_1995	Gulf of Aqaba	—	—	Porites	0.780435	0.280056	23	29.263	34.935
	Poulsen_2006	Arabian Gulf	Jurayd	—	Porites	1.31	0.55	7	27.2	49.96
	Poulsen_2006	Arabian Gulf	Jana	—	Porites	1.39	0.65	7	27.38	49.88
	Poulsen_2006	Arabian Gulf	Karan	—	Porites	1.63	0.59	7	27.71	49.83
	Poulsen_2006	Arabian Gulf	Gosp-4	—	Porites	1.43	0.5	7	28.35	48.9
	Grigg_1982	Hawaii	Hawaii	Hawaii	Porites	1.8	—	—	19.5	204.05
	Grigg_1982	Hawaii	Maui	Maui	Porites	1.65	—	—	20.903	203.313
	Grigg_1982	Hawaii	Oahu	Oahu	Porites	1.55	—	—	21.295	201.938
	Grigg_1982	Hawaii	Kauai	Kauai	Porites	1.49	—	—	21.966	200.258
	Grigg_1982	Hawaii	Nihoa	Nihoa	Porites	1.25	—	—	23.058	198.075
	Grigg_1982	Hawaii	Necker	Necker	Porites	1.2	—	—	23.641	193.827
	Grigg_1982	Hawaii	French Frigates Shoals	FFS	Porites	1.18	—	—	23.573	195.297
	Grigg_1982	Hawaii	Gardner Pinnacles	Gardner	Porites	1.05	—	—	25.012	192.02
	Grigg_1982	Hawaii	Maro Reef	Maro	Porites	0.9	—	—	25.419	189.413
	Grigg_1982	Hawaii	Laysan	Laysan	Porites	0.82	—	—	25.771	188.257
	Grigg_1982	Hawaii	Lisianski	Lisianski	Porites	0.77	—	—	26.056	186.032
	Grigg_1982	Hawaii	Pearl & Hermes Atoll	P&H	Porites	0.6	—	—	27.828	184.245
	Grigg_1982	Hawaii	Midway	Midway	Porites	0.53	—	—	28.195	182.604
	Grigg_1982	Hawaii	Kure	Kure	Porites	0.5	—	—	28.389	181.696
	Shi_2012	South China Sea	Meiji Reef	—	Porites	1.3	0.35	—	9.903	115.541
	Chen_2011	South China Sea	Daya Bay	—	Porites	1.4	—	—	22.448	114.691
	Scoffin_etal_1992	Thailand	Ao Man	AM	Porites	2.36517	0.303665	11	7.832	98.404
	Scoffin_etal_1992	Thailand	Ko Bon	KB	Porites	2.51477	0.289722	9	7.762	98.335
	Scoffin_etal_1992	Thailand	Ko Hi	KH	Porites	2.82447	0.429577	15	7.744	98.383
	Scoffin_etal_1992	Thailand	Ko Lon	KL	Porites	2.46551	0.39507	9	7.794	98.382
	Scoffin_etal_1992	Thailand	Ko Miang	KM	Porites	2.11998	0.457866	6	8.666	97.651
	Scoffin_etal_1992	Thailand	Ko Racha	KR	Porites	2.13242	0.371191	14	7.612	98.37
	Scoffin_etal_1992	Thailand	Porites Bay	PB	Porites	2.51903	0.346491	8	7.812	98.404
	Scoffin_etal_1992	Thailand	Ko Phi Phi	PP	Porites	2.51774	0.142334	7	7.731	98.784
	Scoffin_etal_1992	Thailand	Shark Point	SP	Porites	2.21986	0.212375	7	7.802	98.406
	Scoffin_etal_1992	Thailand	Tin Smelter	TS	Porites	2.21246	0.42405	11	7.825	98.403
	Scoffin_etal_1992	Thailand	Yam Yen	YY	Porites	2.27305	0.310758	10	7.811	98.345
	Fabricus_2011	Papua New Guinea	Dobu Is.	—	Porites	1.583	0.123	—	-9.745	150.879
	Fabricus_2011	Papua New Guinea	Esa'Ala	—	Porites	1.583	0.123	—	-9.739	150.822
	Fabricus_2011	Papua New Guinea	Upa-Upasina	—	Porites	1.583	0.123	—	-9.828	150.819
	Cooper_2012	Western Australia	Clerke	CLE	Porites	1.72609	0.536238	551	-17.266	119.366
	Cooper_2012	Western Australia	Imperieuse	IMP	Porites	1.89393	0.355136	443	-17.516	118.966
	Cooper_2012	Western Australia	Bundegi	BUN	Porites	1.53186	0.355379	416	-21.833	114.183
	Cooper_2012	Western Australia	Tantabidbi	TNT	Porites	1.21405	0.375274	732	-21.9	113.966
	Cooper_2012	Western Australia	Coral Bay	CLB	Porites	1.7445	0.287535	410	-23.033	113.816
	Cooper_2012	Western Australia	Houtman Abrolhos	HAB	Porites	0.92286	0.301911	267	-28.466	113.766
	Edinger_2000	Java Sea	Gosong Cemara	—	Porites	2.09	0.818535	4	-5.832	110.377
	Edinger_2000	Java Sea	Pulau Kecil	—	Porites	2.19	0.69282	3	-5.825	110.506
	Edinger_2000	Java Sea	Lagun Marican	—	Porites	1.39	0.714143	3	-5.817	110.462
	Edinger_2000	Java Sea	P. Panjang	—	Porites	1.51	0.632456	4	-6.575	110.628
	Edinger_2000	Java Sea	Bondo	—	Porites	1.54	0.774597	4	-6.44	110.712
	De'ath_2009	GBR	13-050 Reef	050	Porites	1.778	0.385562	90	-13.33	143.95
	De'ath_2009	GBR	13-055 Reef	055	Porites	1.494	0.409663	104	-13.3	143.77
	De'ath_2009	GBR	21-141 Reef	141	Porites	1.20468	0.225697	151	-21.52	151.22
	De'ath_2009	GBR	20-200 Reef	200	Porites	1.0861	0.337077	94	-20.5	150.55
	De'ath_2009	GBR	Abraham	ABR	Porites	1.31247	0.318563	189	-22.1	152.5
	De'ath_2009	GBR	Agincourt	AGC	Porites	1.92107	0.483587	89	-15.9	145.82
	De'ath_2009	GBR	Ashmore	ASH	Porites	1.23932	0.260543	47	-10.25	144.5
	De'ath_2009	GBR	Batt Reef	BAT	Porites	1.75838	0.472646	88	-16.38	145.7
	De'ath_2009	GBR	Bedarra Is	BED	Porites	1.69127	0.411874	61	-18	146.15
	De'ath_2009	GBR	Burkitt Is	BKT	Porites	2.05389	0.579383	65	-13.95	143.75
	De'ath_2009	GBR	Boulder Reef	BOU	Porites	1.59053	0.443221	82	-15.42	145.42
	De'ath_2009	GBR	Brook	BRO	Porites	1.71146	0.473383	88	-18.15	146.28
	De'ath_2009	GBR	Britomart	BRT	Porites	1.48959	0.296014	172	-18.23	146.73
	De'ath_2009	GBR	Cid Harbour	CID	Porites	1.17825	0.294877	92	-20.27	148.93
	De'ath_2009	GBR	Conical Rocks	CNR	Porites	2.10831	0.645855	85	-15.13	145.32
	De'ath_2009	GBR	Coombe	COO	Porites	1.42655	0.382258	67	-18.03	146.18
	De'ath_2009	GBR	Credlin	CRE	Porites	1.13879	0.313439	99	-20.53	149.95
	De'ath_2009	GBR	Darnley	DNL	Porites	1.7886	0.564025	86	-9.58	143.77
	De'ath_2009	GBR	Double Is	DOU	Porites	1.89979	0.439088	62	-16.73	145.68
	De'ath_2009	GBR	Eel	EEL	Porites	1.77653	0.48872	64	-12.5	143.52
	De'ath_2009	GBR	Great Palm Island	GPI	Porites	2.04045	0.55705	170	-18.68	146.58
	De'ath_2009	GBR	Hannah	HAN	Porites	1.83611	0.392738	103	-13.87	143.72
	De'ath_2009	GBR	Havannah	HAV	Porites	1.50879	0.375733	88	-18.85	146.55
	De'ath_2009	GBR	Hay Island	HAY	Porites	1.87515	0.437311	114	-13.67	143.68
	De'ath_2009	GBR	High Is	HIG	Porites	1.88328	0.470996	93	-17.17	146
	De'ath_2009	GBR	Hook	HKO	Porites	1.63799	0.455546	86	-20.07	148.95
	De'ath_2009	GBR	East Hope Is	HOP	Porites	1.85967	0.339265	61	-15.73	145.45
	De'ath_2009	GBR	Jeannie River	JNE	Porites	1.08357	0.362451	87	-14.67	144.93
	De'ath_2009	GBR	Kelso	KEL	Porites	2.14722	0.415017	307	-18.42	146.98
	De'ath_2009	GBR	Kent	KEN	Porites	1.54412	0.518572	94	-17.67	146.18
	De'ath_2009	GBR	Kurrimine	KMN	Porites	1.41882	0.426317	81	-17.78	146.13
	De'ath_2009	GBR	Lagoon	LAG	Porites	1.81316	0.359875	107	-12.38	143.73
	De'ath_2009	GBR	Lodestone	LOD	Porites	1.67658	0.387067	84	-18.7	147.1
	De'ath_2009	GBR	Low Is	LOW	Porites	2.22609	0.496841	85	-16.38	145.57
	De'ath_2009	GBR	Lupton Is	LUP	Porites	1.56303	0.334897	150	-20.28	149.12
	De'ath_2009	GBR	Magnetic	MAG	Porites	1.45088	0.352352	87	-19.15	146.87
	De'ath_2009	GBR	Masthead	MAS	Porites	1.03506	0.314683	87	-23.55	151.73
	De'ath_2009	GBR	McDonald Reef	MCD	Porites	1.58295	0.466821	49	-13.55	143.65
	De'ath_2009	GBR	Myrmidon Reef	MYR	Porites	1.70401	0.472893	1314	-18.2775	147.38
	De'ath_2009	GBR	Nelly Bay	NEL	Porites	1.67372	0.529724	427	-19.1638	146.854
	De'ath_2009	GBR	Night Island	NIG	Porites	1.50045	0.481169	63	-13.18	143.57
	De'ath_2009	GBR	N Molle Is	NMI	Porites	1.88762	0.586968	84	-20.23	148.8
	De'ath_2009	GBR	Normanby	NOR	Porites	1.46575	0.412462	85	-17.2	146.07
	De'ath_2009	GBR	Otter	OTT	Porites	2.13672	0.720128	89	-18.05	146.58
	De'ath_2009	GBR	Pandora Reef	PAN	Porites	1.68351	0.505624	1294	-18.8148	146.436
	De'ath_2009	GBR	Pascoe	PCO	Porites	1.52762	0.511312	86	-12.52	143.27
	De'ath_2009	GBR	Middle Percy	PER	Porites	1.33923	0.273932	61	-21.65	150.25
	De'ath_2009	GBR	S Petherbridge Is	PET	Porites	1.62251	0.345718	65	-14.73	145.1
	De'ath_2009	GBR	Pipon	PIP	Porites	1.92728	0.365683	67	-14.12	144.52
	De'ath_2009	GBR	Portland Roads	POR	Porites	2.12945	0.504223	64	-12.6	143.42
	De'ath_2009	GBR	Rib Reef	RIB	Porites	1.89018	0.579576	1511	-18.49	146.87
	De'ath_2009	GBR	Rocky Island	ROC	Porites	1.97857	0.489103	33	-12.6	143.4
	De'ath_2009	GBR	Red Wallis Island	RWI	Porites	1.9056	0.55892	86	-10.83	142.17
	De'ath_2009	GBR	Sanctuary	SAN	Porites	1.11772	0.313985	85	-22.07	152.67
	De'ath_2009	GBR	Scawfell	SCF	Porites	1.74675	0.277013	87	-20.88	149.6
	De'ath_2009	GBR	Shaw Is	SHW	Porites	1.13669	0.273084	104	-20.45	149.07
	De'ath_2009	GBR	Stanley Reef	SLY	Porites	1.87094	0.513167	112	-19.28	148.07
	De'ath_2009	GBR	S Molle Is	SMI	Porites	1.43932	0.430812	85	-20.27	148.83
	De'ath_2009	GBR	Snapper Is	SNA	Porites	2.22677	0.574735	83	-16.29	145.46
	De'ath_2009	GBR	Stonehaven	SNH	Porites	1.92886	0.479882	93	-20.1	148.9
	De'ath_2009	GBR	Stephens Is	STE	Porites	1.48193	0.260026	38	-17.73	146.15
	De'ath_2009	GBR	Sweetlip	SWL	Porites	1.63387	0.438132	451	-22.27	152.75
	De'ath_2009	GBR	Two Isles	TWO	Porites	1.67977	0.375514	90	-15.03	145.42
	De'ath_2009	GBR	Tydeman	TYD	Porites	1.6581	0.281611	86	-14	144.52
	De'ath_2009	GBR	Undine	UND	Porites	1.51704	0.322107	89	-16.12	145.63
	De'ath_2009	GBR	Watson Is	WAT	Porites	1.85008	0.408022	58	-14.47	144.88
	De'ath_2009	GBR	Wheeler	WHE	Porites	1.95553	0.625637	170	-18.8	147.53
	De'ath_2009	GBR	Whitsunday Island	WHI	Porites	1.71153	0.526401	705	-20.1679	148.957
	De'ath_2009	GBR	Yankee	YNK	Porites	1.54487	0.289356	85	-18.57	147.5
	Carricart-Ganivet_2001	Gulf of Mexico	Alacrán	AA	Montastraea	1.50333	0.0550757	3	22.525	270.346
	Carricart-Ganivet_2001	Gulf of Mexico	Anegada	AN	Montastraea	1.325	0.194191	6	19.159	264.147
	Carricart-Ganivet_2001	Gulf of Mexico	Cayo Arcas	CA	Montastraea	1.465	0.120208	2	20.207	268.037
	Carricart-Ganivet_2001	Gulf of Mexico	Cayo Arenas	CR	Montastraea	1.48	0.169706	2	22.117	268.615
	Carricart-Ganivet_2001	Gulf of Mexico	Isda Verde	IV	Montastraea	1.2325	0.0906918	4	19.082	264.155
	Carricart-Ganivet_2001	Gulf of Mexico	Triángulo Arcas	TO	Montastraea	1.52333	0.0750555	3	20.946	267.739
	Please note that data for 'Cooper_2012' and 'De'ath_2009' were sourced from the Australian Institute of Marine Science (AIMS). Full details appear in the reference list below: AIMS (2014a) provides access to ‘De'ath_2009’ data and AIMS (2014b) provides access to ‘Coper_2012’ data.
	References
	Australian Institute of Marine Science (AIMS): Coral calcification in massive Porites of the Great Barrier Reef, over a 400 year period, available at: http://data.aims.gov.au/metadataviewer/uuid/ff433c10-ea4d-11dc-823c-00008a07204e, accessed: 30 January 2014, 2014a
	Australian Institute of Marine Science (AIMS): Growth of Western Australian corals in the Anthropocene, available at: http://data.aims.gov.au/metadataviewer/uuid/4f39c641-8450-4ea0-b2b6-4f3d582645f8, accessed:14 Febuary 2014, 2014b
	Carricart-Ganivet, J. P. and Merino, M.: Growth responses of the reef-building coral Montastraea annularis along a gradient of continental influence in the southern Gulf of Mexico, Bull. Mar. Sci., 68, 133-146, 2001.
	Chen, T., Yu, K., Shi, Q., Chen, T., and Wang, R.: Effect of global warming and thermal effluents on calcification of the Porites coral in Daya Bay, northern South China Sea, J. Trop. Oceanogr., 30, 1-9, 2011.
	Cooper, T. F., O'Leary, R. A., and Lough, J. M.: Growth of Western Australian corals in the Anthropocene, Science, 335, 593-596, 2012.
	De'ath, G., Lough, J. M., and Fabricius, K. E.: Declining coral calcification on the Great Barrier Reef, Science, 323, 116-119, 2009.
	Edinger, E. N., Limmon, G. V., Jompa, J., Widjatmoko, W., Heikoop, J. M., and Risk, M. J.: Normal coral growth rates on dying reefs: are coral growth rates good indicators of reef health?, Mar. Pollut. Bull., 40, 404-425, 2000.
	Fabricius, K. E., Langdon, C., Uthicke, S., Humphrey, C., Noonan, S., De'ath, G., Okazaki, R., Muehllehner, N., Glas, M. S., and Lough, J. M.: Losers and winners in coral reefs acclimatized to elevated carbon dioxide concentrations, Nature Climate Change, 1, 165-169, 2011.
	Grigg, R. W.: Darwin Point: a threshold for atoll formation, Coral Reefs, 1, 29-34, 1982.
	Heiss, G. A.: Carbonate production by scleractinian corals at Aqaba, Gulf of Aqaba, Red Sea, Facies, 33, 19-34, 1995.
	Poulsen, A., Burns, K., Lough, J., Brinkman, D., and Delean, S.: Trace analysis of hydrocarbons in coral cores from Saudi Arabia, Org. Geochem., 37, 1913-1930, 2006.
	Scoffin, T. P., Tudhope, A. W., Brown, B. E., Chansang, H., and Cheeney, R. F.: Patterns and possible environmental controls of skeletogenesis of Porites lutea, South Thailand, Coral Reefs, 11, 1-11, 1992.
	Shi, Q., Yu, K. F., Chen, T. R., Zhang, H. L., Zhao, M. X., and Yan, H. Q.: Two centuries-long records of skeletal calcification in massive Porites colonies from Meiji Reef in the southern South China Sea and its responses to atmospheric CO2 and seawater temperature, Science China-Earth Sciences, 55, 1-12, 2012.
